# Supplementary material for: FXR Mediates Adenylyl Cyclase 8 Expression in Pancreatic β-Cells
Source: PubMed Central journal article supplement (PMC6710725; doi:10.1155/2019/8915818), 2019-08-14

## **Supplementary materials**

### **Supplementary Figure Legends**

#### **Supplementary Figure 1. ADCY8 expression in islets of ZDF rats.**

Representative blots of ADCY8 protein expression of three independent experiments in control and ZDF rat islets. Data are means  $\pm$  SEM. \* $p < 0.05$ .

#### **Supplementary Figure 2. GLP-1 potentiated insulin secretion in FXR knockdown INS-1 832/13 cells.**

Scramble and shFXR INS-1 832/13 cells were stimulated with 2.8 mM glucose or 16.8 mM glucose in the presence or absence of 10 nM GLP-1 for 30 min. Data are means  $\pm$  SEM.  $n=4$ . \*\* $p < 0.01$ .

Suppl.Fig.1

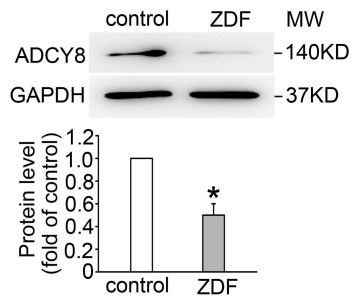

Suppl.Fig.2

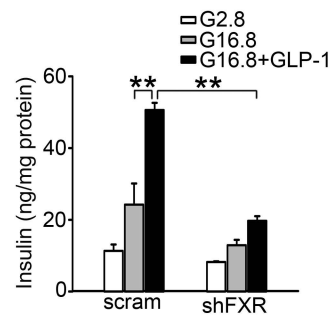

Supplement: 8915818.f1.pdf [file 8915818.f1.pdf]
